# Supplementary material for: Engineered Microparticles for Treatment of Murine Brain Metastasis by Reprograming Tumor Microenvironment and Inhibiting MAPK Pathway
Source: PubMed Central journal article supplement (PMC10015898; doi:10.1002/advs.202206212), 2023-01-25
Supplement: ADVS-10-2206212-s001.pdf [file ADVS-10-2206212-s001.pdf]

## Supporting Information

for *Adv. Sci.*, DOI 10.1002/advs.202206212

Engineered Microparticles for Treatment of Murine Brain Metastasis by Reprogramming  
Tumor Microenvironment and Inhibiting MAPK Pathway

*Lisen Lu, Huaduan Zi, Jie Zhou, Jing Huang, Zihan Deng, Zijian Tang, Li Li, Xiujuan Shi, Pui-Chi Lo, Jonathan F. Lovell, Deqiang Deng\*, Chao Wan\* and Honglin Jin\**

## Supplementary information

### Engineered microparticles for treatment of murine brain metastasis by reprogramming tumor microenvironment and inhibiting MAPK pathway

Lisen Lu<sup>a,b,1</sup>, Huaduan Zi<sup>c,1</sup>, Jie Zhou<sup>b,1</sup>, Jing Huang<sup>a</sup>, Zihan Deng<sup>a</sup>, Zijian Tang<sup>a</sup>, Li Li<sup>a</sup>, Xiujuan Shi<sup>a</sup>, Pui-Chi Lo<sup>d</sup>, Jonathan F. Lovell<sup>d</sup>, Deqiang Deng<sup>a,\*</sup>, Chao Wan<sup>b,\*</sup>, Honglin Jin<sup>a,\*</sup>

<sup>a</sup>College of Biomedicine and Health and College of Life Science and Technology, Huazhong Agricultural University, Wuhan, 430070, China

<sup>b</sup>Cancer Center, Union Hospital, Tongji Medical College, Huazhong University of Science and Technology, Wuhan 430022, China

<sup>c</sup>Beijing Institute of Clinical Research, Beijing Friendship Hospital, Capital Medical University, Beijing 100050, China.

<sup>d</sup>Department of Biomedical Sciences, City University of Hong Kong, Tat Chee Avenue, Kowloon, Hong Kong, China

<sup>e</sup>Department of Biomedical Engineering, University at Buffalo, State University of New York, Buffalo, NY 14260, USA

<sup>1</sup>These authors contributed equally to this work.

\*Corresponding authors.

E-mail addresses: [jin@hust.edu.cn](mailto:jin@hust.edu.cn) (H. Jin), [wanc@hust.edu.cn](mailto:wanc@hust.edu.cn) (C. Wan).

**KEYWORDS.** Cancer immunotherapy, Extracellular vesicles, Macrophages polarization, Blood brain barrier, USP7

Table 1. Protein concentration of obtained MPs treated in different ways.

| Cell processing | Concentration (mg/mL) |
|-----------------|-----------------------|
| PBS             | 0.12 ± 0.02           |
| DDP             | 0.26 ± 0.05           |
| UV              | 1.13 ± 0.09           |
| RT              | 1.12 ± 0.08           |

Table 2. The sequence of target gene.

| Gene name   | Sequence                                                                                                                                                                                                                                                                                                                                                                                                                                                                                                                                                                                                                                                                                                                                                                                                                                                                                                                                                                                                                                                               |
|-------------|------------------------------------------------------------------------------------------------------------------------------------------------------------------------------------------------------------------------------------------------------------------------------------------------------------------------------------------------------------------------------------------------------------------------------------------------------------------------------------------------------------------------------------------------------------------------------------------------------------------------------------------------------------------------------------------------------------------------------------------------------------------------------------------------------------------------------------------------------------------------------------------------------------------------------------------------------------------------------------------------------------------------------------------------------------------------|
| R4F-GFP-GPI | GCCACCATGAGGCTCACCGTGGGTGCCCTGCTGGCCTGCG<br>CTGCCCTGGGGCTGTGTCTGGCTGGTGGGTCAGGTGGGAG<br>CTTCGCCGAAAAGTTCAAAGAGGCTGTGAAGGATTACTTC<br>GCTAAGTTCTGGGACGGTGGGTCAGGTGGGAGCATGGTGA<br>GCAAGGGCGAGGAGCTGTTACCGGGGTGGTGCCCATCCT<br>GGTCGAGCTGGACGGCGACGTAAACGGCCACAAGTTCAG<br>CGTGTCCGGCGAGGGCGAGGGCGATGCCACCTACGGCAA<br>GCTGACCCTGAAGTTCATCTGCACCACCGGCAAGCTGCC<br>GTGCCCTGGCCACCCTCGTGACCACCCTGACCTACGGCG<br>TGCAGTGCTTCAGCCGCTACCCCGACCACATGAAGCAGCA<br>CGACTTCTTCAAGTCCGCCATGCCCGAAGGCTACGTCCAG<br>GAGCGCACCATCTTCTTCAAGGACGACGGCAACTACAAGA<br>CCCGCGCCGAGGTGAAGTTCGAGGGCGACACCCTGGTGAA<br>CCGCATCGAGCTGAAGGGCATCGACTTCAAGGAGGACGG<br>CAACATCCTGGGGCACAAGCTGGAGTACAACACTACAACAGC<br>CACAACGTCTATATCATGGCCGACAAGCAGAAGAACGGC<br>ATCAAGGTGAACTTCAAGATCCGCCACAACATCGAGGACG<br>GCAGCGTGCAGCTCGCCGACCACTACCAGCAGAACACCCC<br>CATCGGCGACGGCCCCGTGCTGCTGCCCGACAACCACTAC<br>CTGAGCACCCAGTCCGCCCTGAGCAAAGACCCCAACGAGA<br>AGCGCGATCACATGGTCCTGCTGGAGTTCGTGACCGCCGC<br>CGGGATCACTCTCGGCATGGACGAGCTGTACAAGGGTGGC<br>AGCTCCCTGCAGTCCACAGCTGGTCTCCTGGCTCTCTCTCT<br>CTCTCTTCTACATCTCTACTGT |

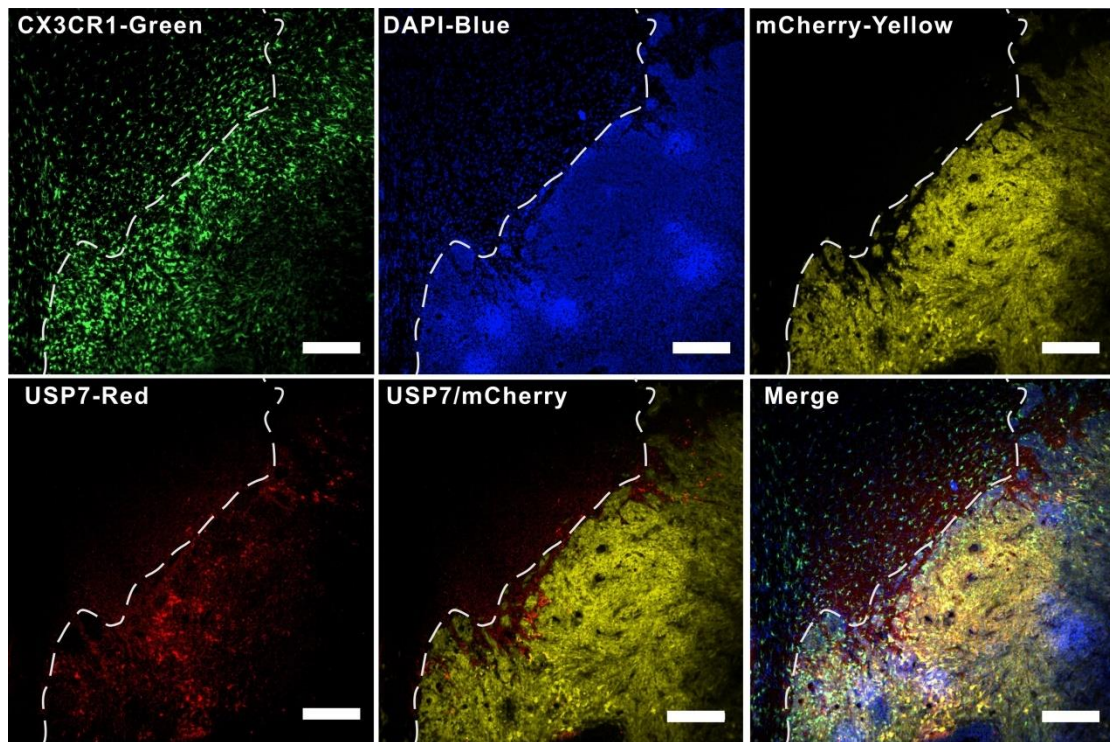

**Figure S1.** To verify the expression of USP7 in mouse BRM model. CX3CR1<sup>GFP/+</sup> transgenic mice (purchased from Jackson laboratory, Strain#: 005582) and LLC-mCherry cells were used in this model. Scale bar is 200  $\mu$ m.

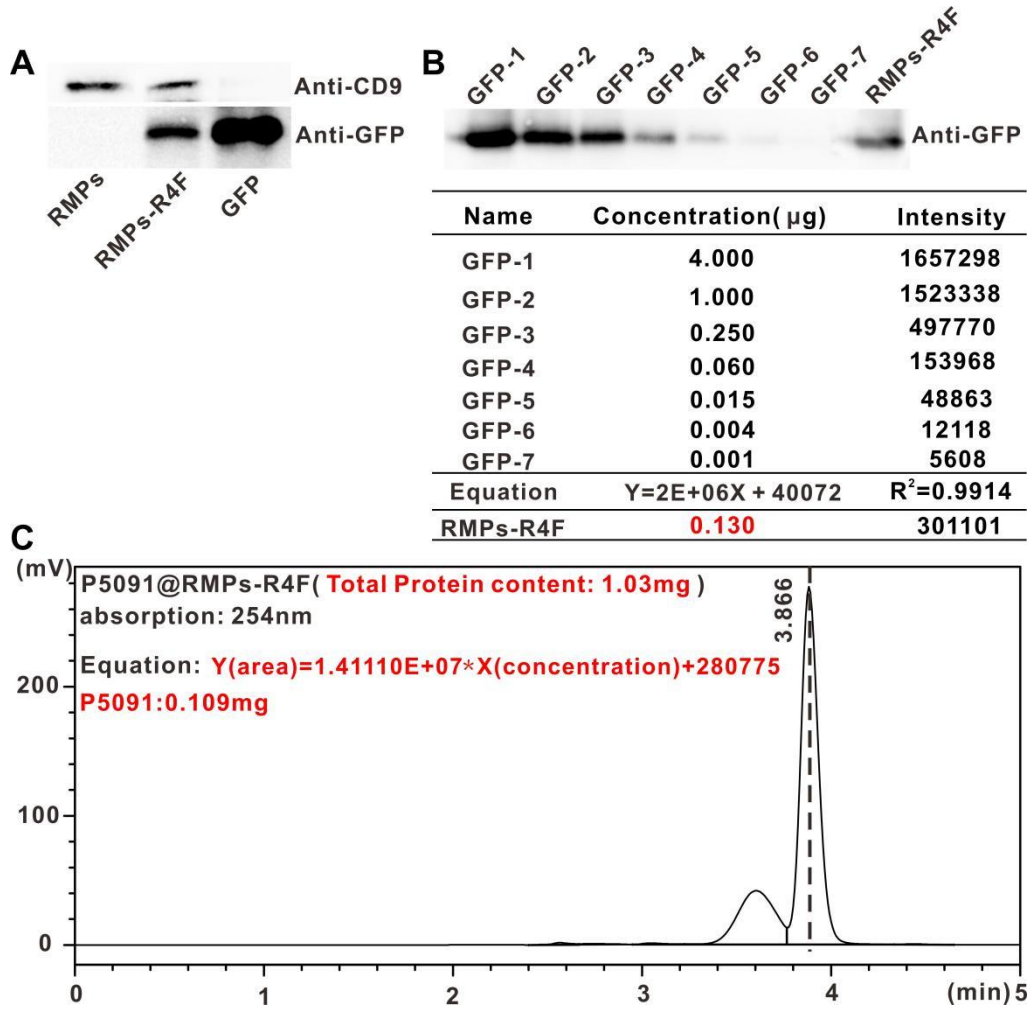

**Figure S2.** Identify the content of P5091 and R4F in P5091@RMPs-R4F. (A) The expression of GFP in RMPs-R4F or in RMPs. (B) Identify the gray-scale values of different concentrations of GFP protein and GFP contained in RMPs-R4F. (C) Using HPLC to determine the content of P5091 in RMPs-R4F.

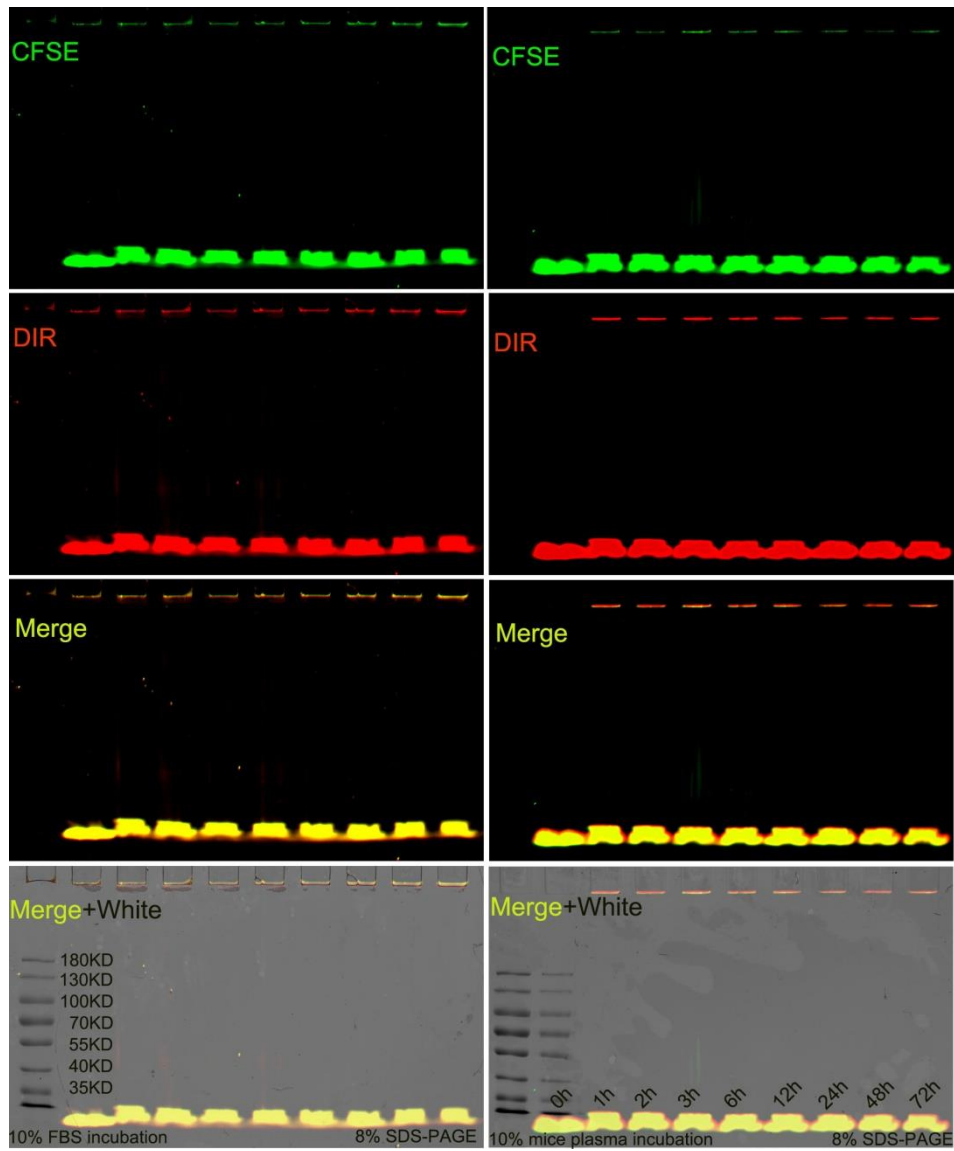

**Figure S3.** The stability of P5091@RMPs-R4F in mouse serum and fetal bovine serum was determined by native SDS-PAGE. Green represents CFSE dye, Red represents DIR and Yellow represents the col-location of cell membrane and cell contents.

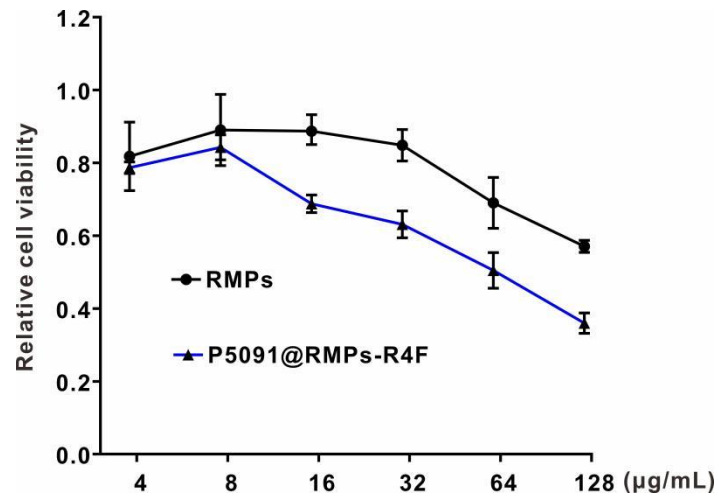

**Figure S4.** Assessment of the therapeutic ability of P5091@RMPs-R4F against LLC cells using CCK8 assay.

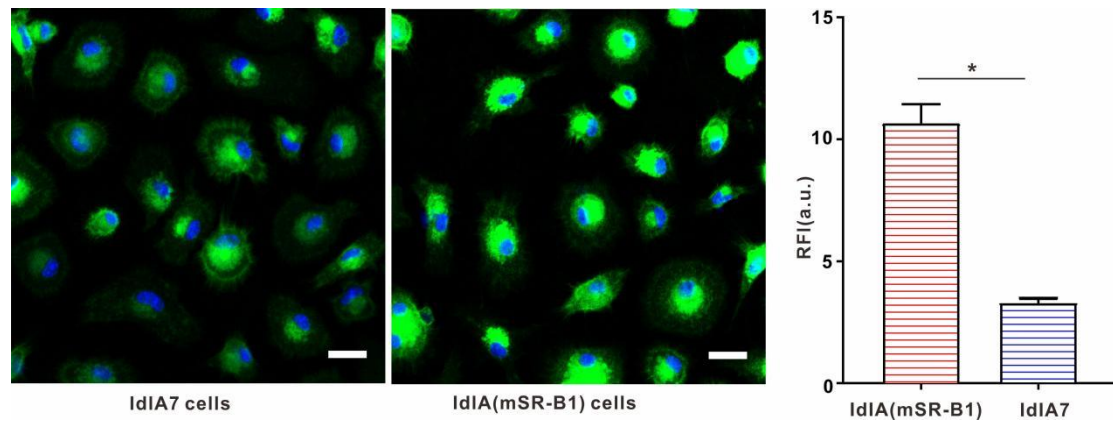

**Figure S5.** Analysis of the specific targeting properties of P5091@RMPs-R4F to SR-B1 receptor. Scale bar is 20  $\mu$ m. Blue is DAPI, Green is PKH67. Statistical analysis was performed using unpaired t-test. The data represented as the mean  $\pm$  SEM (n = 4). \*P < 0.05, \*\*P < 0.01, \*\*\*P < 0.001.

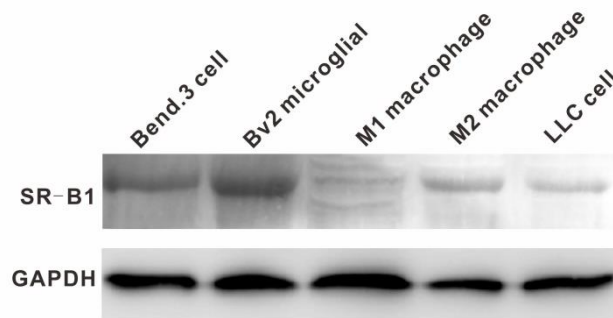

**Figure S6.** Analysis of the expression of SR-B1 receptor in bEnd.3, M1 $\Phi$ , M2 $\Phi$ , BV2 microglial and LLC cells by western blotting.



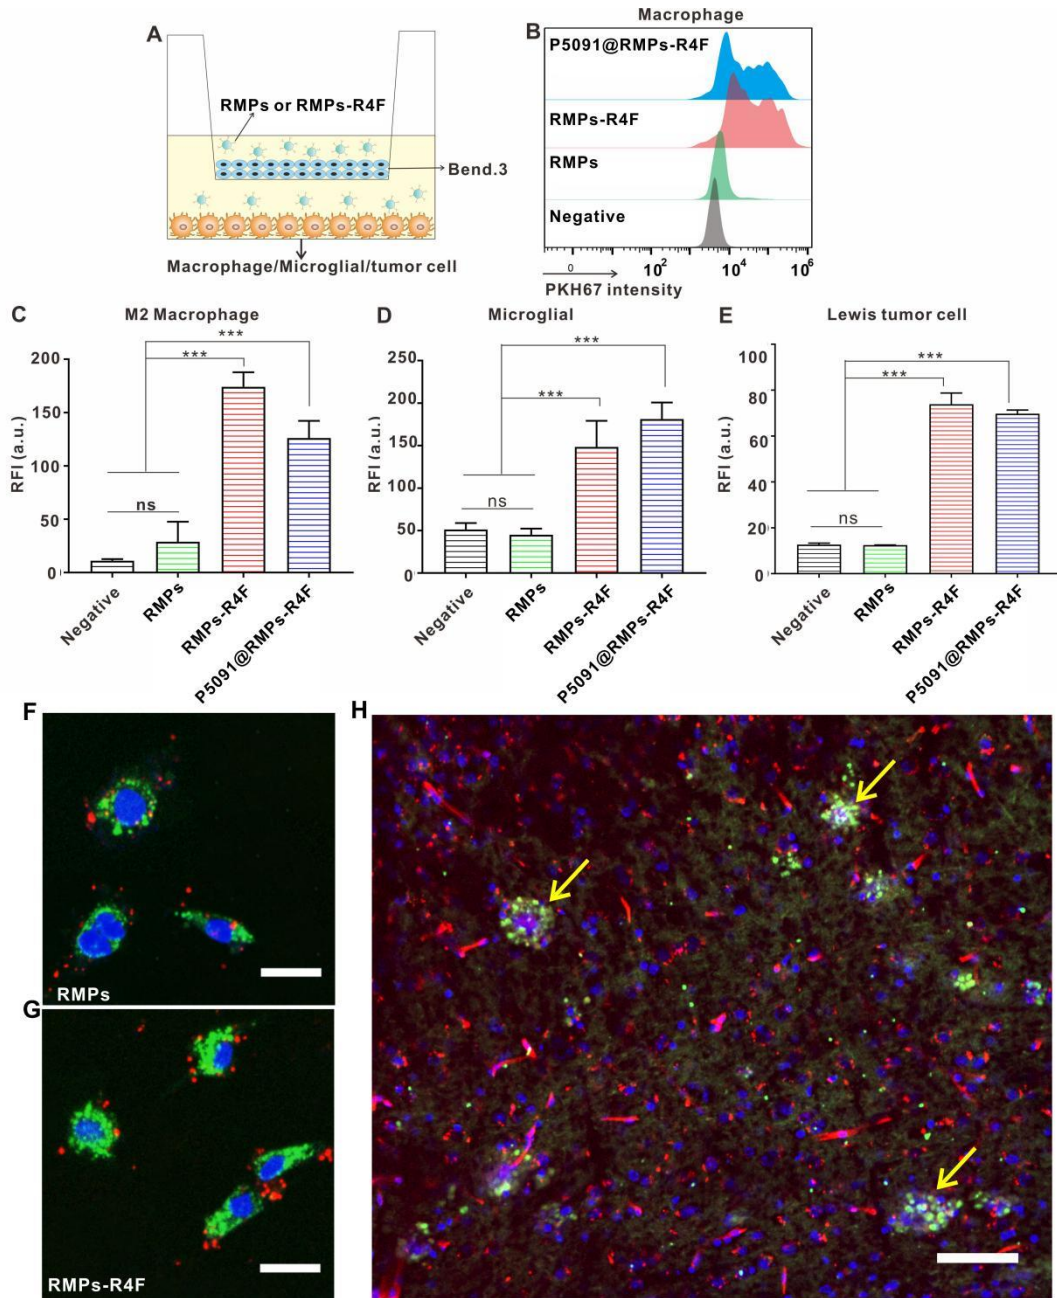

**Figure S7. Transwell experiment to verify the ability of crossing BBB.** (A) Schematic diagram of transwell experiment. (B) Representative fluorescent intensity of M2Φ. The M2Φ were incubated with PKH67 stained MPs (RMPs, RMPs-R4F or P5091@RMPs-R4F) that were added in the upper chamber for 24 h and followed with flow cytometry analysis. (C-E) Statistics of fluorescent intensity of M2Φ, BV2 microglial, LLC cells 24 h after different PKH67 stained MPs (RMPs, RMPs-R4F or P5091@RMPs-R4F) were added to the upper chamber by using flow cytometry. Statistical analysis was performed using one-way ANOVA with Tukey's multiple

comparison test. Data are presented as the mean  $\pm$  SEM ( $n = 3$ ). \* $P < 0.05$ , \*\* $P < 0.01$ , \*\*\* $P < 0.001$ , and ns: not significant. (F-G) Confocal imaging analysis of MPs transendocytosis. Scale bar is 20  $\mu\text{m}$ . (H) Immunofluorescence was used to verify the expression of SR-B1 receptor in the BBB of mice. Red-CD31, Green-SR-B1. Scale bar is 100  $\mu\text{m}$ .

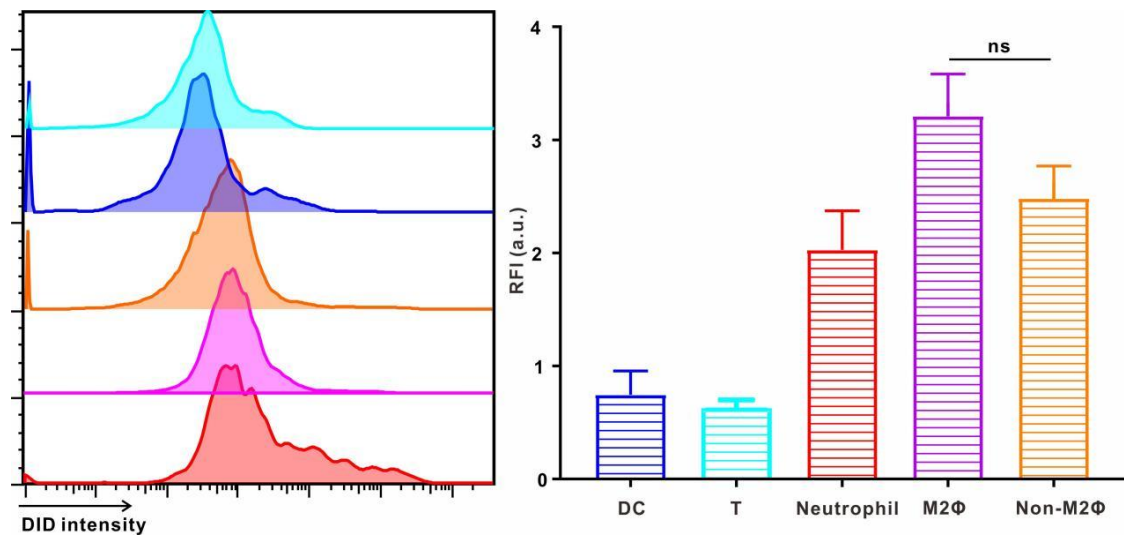

**Figure S8.** Calculation of the MPs uptake by infiltrating immune cells in brain tumors after *i.v.* injection of RMPs. Statistical analysis was performed using one-way ANOVA with Tukey's multiple comparison test ( $n = 3$ ). Data are presented as the mean  $\pm$  SEM. \* $P < 0.05$ , \*\* $P < 0.01$ , \*\*\* $P < 0.001$ .

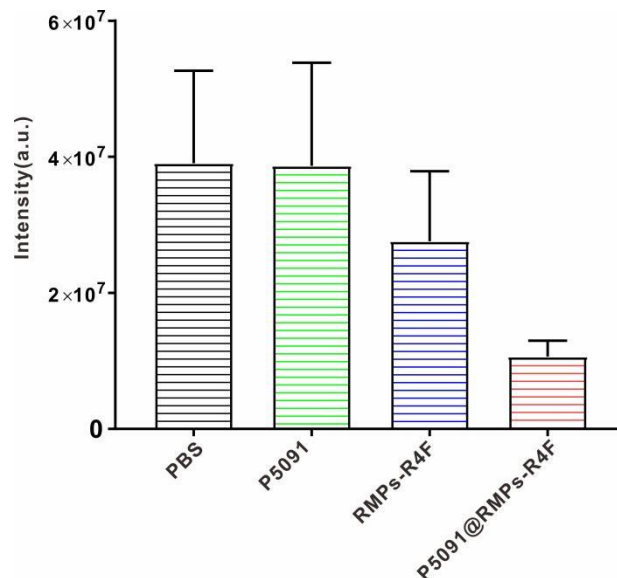

**Figure S9.** Statistics of luminescence intensity of brain in different treatment groups ( $n = 6$ ). Data are presented as the mean  $\pm$  SEM.
